# Supplementary material for: Development and validation of an ADL dependency model for Centenarians: a CHCCS-based cross-sectional cohort study
Source: Research Square preprint supplement (doi:10.21203/rs.3.rs-6738344/v1), 2025-06-29
Supplement: Supplementary file 1 [file 7b74af6c8ea86e6a93560ccb.docx]

Supplementary table 1 The AUC of ROCs in development and validation groups

| Variables | Development group | | |  | Validation group | | |
| --- | --- | --- | --- | --- | --- | --- | --- |
| AUC | 95%CI | *P* value |  | AUC | 95%CI | *P* value |
| Model | 0.796 | 0.763-0.829 | <0.001 |  | 0.800 | 0.750-0.851 | <0.001 |
| Incontinence | 0.574 | 0.531-0.617 | 0.001 |  | 0.585 | 0.519-0.651 | 0.013 |
| BMI | 0.560 | 0.516-0.604 | 0.008 |  | 0.525 | 0.457-0.592 | 0.474 |
| Social | 0.656 | 0.616-0.697 | <0.001 |  | 0.689 | 0.627-0.751 | <0.001 |
| Fall | 0.532 | 0.488-0.576 | 0.161 |  | 0.559 | 0.492-0.625 | 0.088 |

Supplementary figure 1 NRI plot of the mode
