# Supplementary figures and images for: Development and validation of an ADL dependency model for Centenarians: a CHCCS-based cross-sectional cohort study
Source: Research Square preprint supplement (doi:10.21203/rs.3.rs-6738344/v1), 2025-06-29

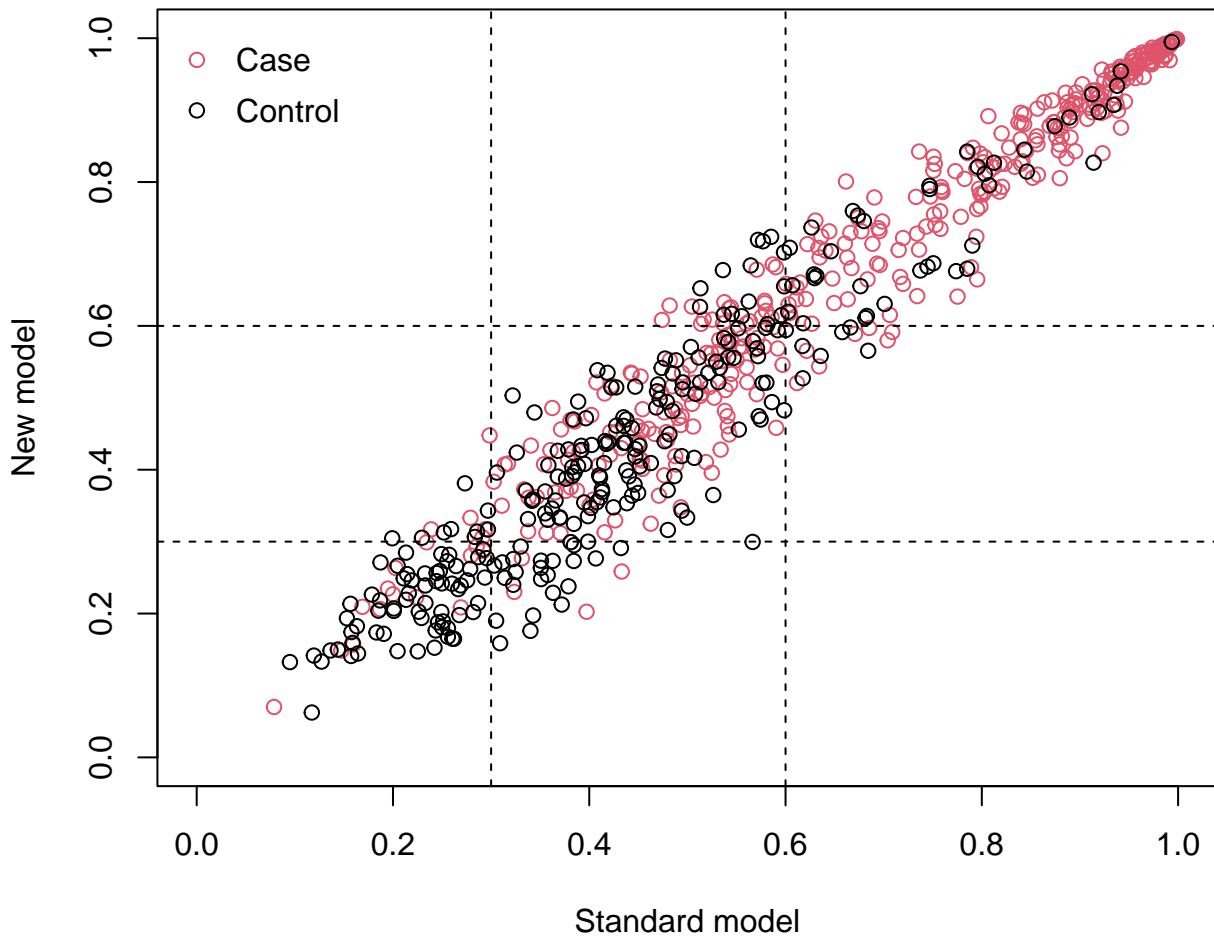

Supplement: Supplementary file 1 [file 60a88b9390d917a42f4ca7d3.pdf]
